# Supplementary material for: Destabilization of linker histone H1.2 is essential for ATM activation and DNA damage repair
Source: PubMed Central journal article supplement (PMC6028381; doi:10.1038/s41422-018-0048-0), 2018-05-29
Supplement: 41422_2018_48_MOESM3_ESM.pdf [file 41422_2018_48_MOESM3_ESM.pdf]

Figure S3

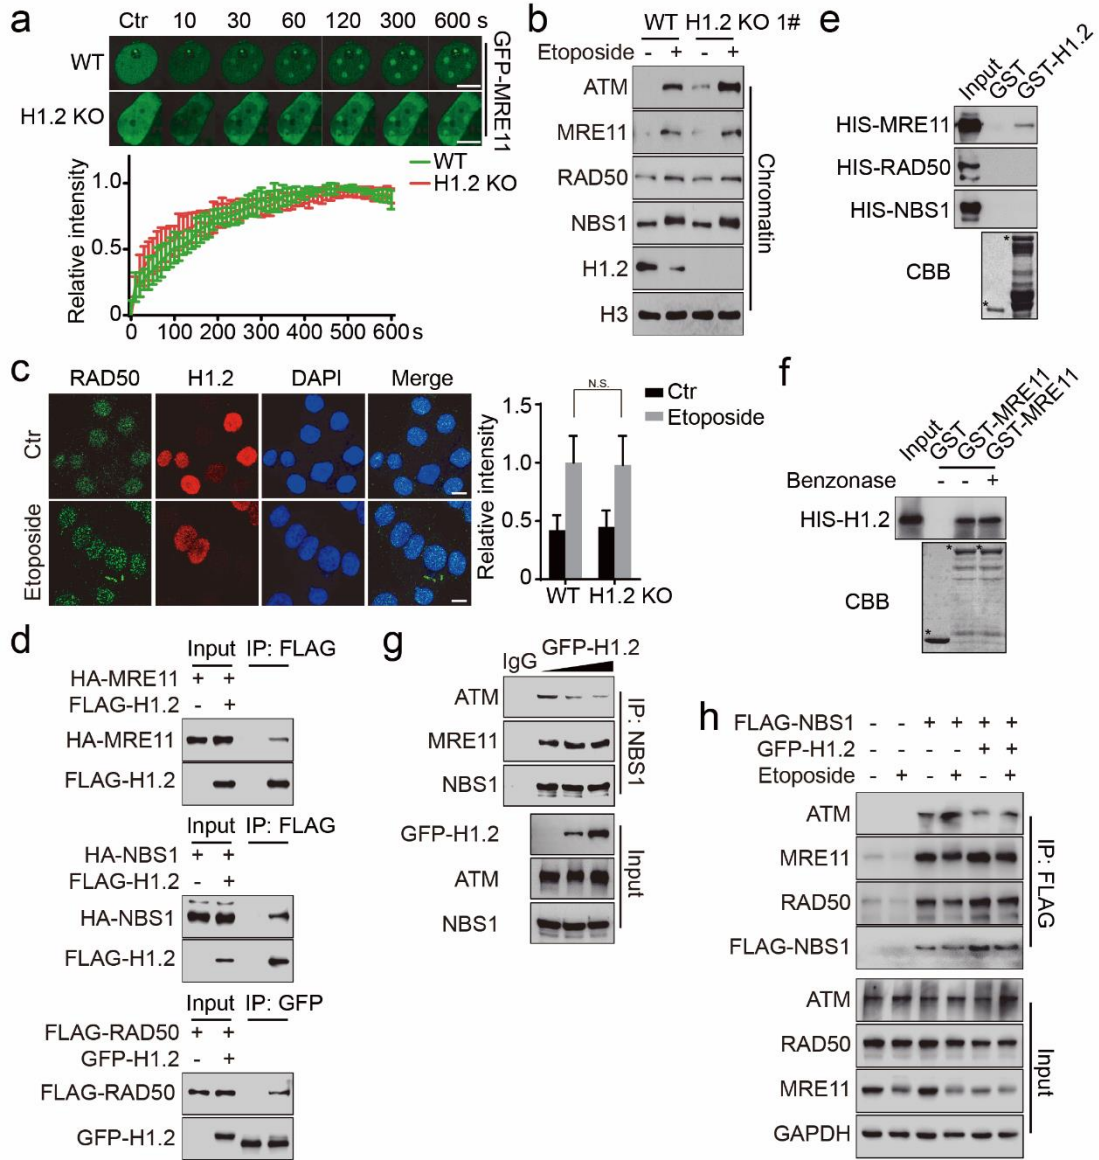

**Figure S3. Linker histone H1.2 inhibits ATM recruitment and activation by interacting with MRN**

**a** WT and H1.2 KO (1#) HeLa cells were transfected with GFP-MRE11 and subjected to laser micro-irradiation-coupled live-cell imaging. Images were taken every 10 s for 10 min and the relative intensity of the irradiation path signal was shown. The data represent the mean  $\pm$  SD. Scale bars, 10  $\mu$ m. **b** WT and H1.2 KO (1#) HeLa cells were treated with 40  $\mu$ M etoposide for 1 h. Chromatin was fractionated and analyzed by immunoblotting. **c** WT and H1.2 KO (1#) HeLa cells were mixed and then treated with 40  $\mu$ M etoposide for 2 h and subjected to immunofluorescence assay with the indicated antibodies or labeled with DAPI. Quantifications of signal intensity are shown. The data represent the mean  $\pm$  SD. Scale bars, 10  $\mu$ m. **d** HEK293T cells were transfected with the indicated plasmids and analyzed by co-IP followed by immunoblotting. **e** GST alone or GST-H1.2 was incubated with HIS-MRE11, RAD50 and NBS1 for GST pull-down assay. \* indicates specific protein bands. **f** GST alone or GST-MRE11 was incubated with HIS-H1.2 for GST pull-down assay with or without benzonase treatment. \* indicates specific protein bands. **g** HeLa cells were transfected with an increasing amount of GFP-H1.2, and the whole cell lysates were immunoprecipitated with NBS1 or IgG antibody and subjected to immunoblotting. **h** HeLa cells were transfected with the indicated plasmids and treated with 40  $\mu$ M etoposide for 1 h. Chromatin extracts were prepared and analyzed by co-IP followed by immunoblotting.
