# Supplementary material for: Destabilization of linker histone H1.2 is essential for ATM activation and DNA damage repair
Source: PubMed Central journal article supplement (PMC6028381; doi:10.1038/s41422-018-0048-0), 2018-05-29
Supplement: 41422_2018_48_MOESM4_ESM.pdf [file 41422_2018_48_MOESM4_ESM.pdf]

Figure S4

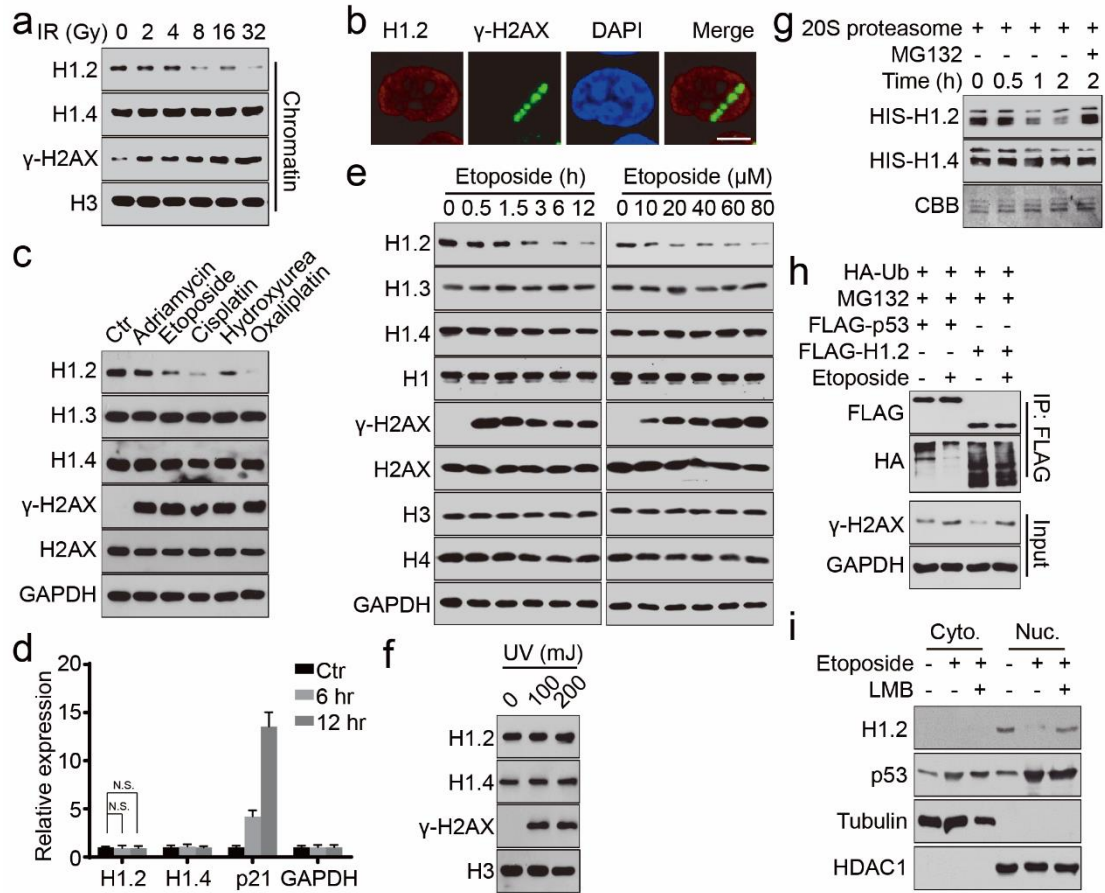

**Figure S4. Linker histone H1.2 is rapidly displaced and degraded upon DNA damage**

**a** HeLa cells were exposed to different doses of irradiation (IR) before collection after 30 min and analyzed by immunoblotting. **b** HeLa cells were subjected to laser micro-irradiation and fixed immediately before immunofluorescence assay. Cells were stained with the indicated antibodies or DAPI. Scale bars, 10  $\mu$ m. **c** HCT116 cells were treated with 1  $\mu$ M adriamycin, 20  $\mu$ M etoposide, 10  $\mu$ M cisplatin, 2 mM hydroxyurea or 10  $\mu$ M oxaliplatin for 12 h and analyzed by immunoblotting. **d** HCT116 cells were treated with 20  $\mu$ M etoposide for the indicated time and total RNA was extracted and H1.2, H1.4, p21 and GAPDH relative gene expression was analyzed by real-time PCR. The data represent the mean  $\pm$  SD. **e** HeLa cells were treated with 20  $\mu$ M etoposide for the indicated time or to increasing concentrations of etoposide for 12 h and analyzed by immunoblotting. **f** HeLa cells were exposed to different doses of ultraviolet (UV) radiation. Cells were collected 1 h after exposure and analyzed by immunoblotting. **g** Recombinant HIS-H1.2 or H1.4 was incubated with 20S proteasome substrate for the indicated time, with or without 10  $\mu$ M MG132 for *in vitro* degradation assay. **h** HCT116 cells were transfected with the indicated plasmids and treated with 20  $\mu$ M etoposide for 12 h. Cells were extracted after treatment of MG132 at 1  $\mu$ M for 4 h and subjected to immunoprecipitation using FLAG-conjugated M2 beads. **i** HeLa cells were treated with etoposide at 20  $\mu$ M for 12 h with or without leptomycin B (LMB) at 1  $\mu$ M. Cytoplasmic (Cyto.) and nucleic (Nuc.) proteins were fractioned and subjected to immunoblotting.
