# Supplementary material for: Destabilization of linker histone H1.2 is essential for ATM activation and DNA damage repair
Source: PubMed Central journal article supplement (PMC6028381; doi:10.1038/s41422-018-0048-0), 2018-05-29
Supplement: 41422_2018_48_MOESM5_ESM.pdf [file 41422_2018_48_MOESM5_ESM.pdf]

Figure S5

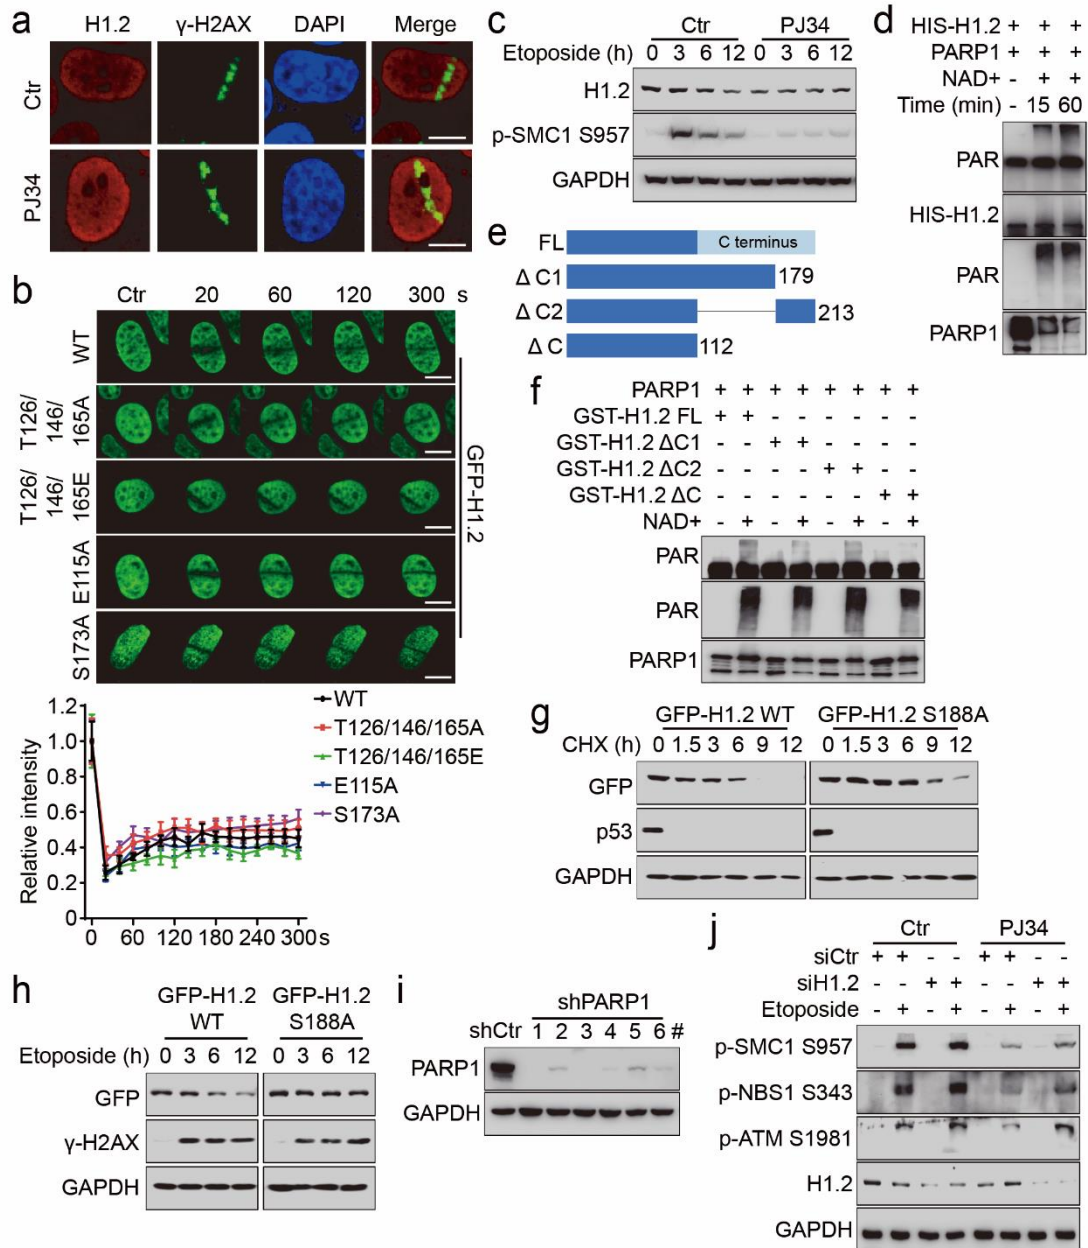

**Figure S5. PARylation of linker histone H1.2 is required for its displacement and ATM activation**

**a** HeLa cells were treated with or without 5  $\mu$ M PJ34 for 1 h, subjected to laser micro-irradiation and fixed immediately before immunofluorescence assay. Cells were stained with the indicated antibodies or DAPI. Scale bars, 10  $\mu$ m. **b** HeLa cells were transfected with the indicated WT or mutated GFP-H1.2 plasmids and subjected to laser micro-irradiation. Images were captured every 20 s for 5 min and quantifications of the IR path signal intensity are shown. The data represent the mean  $\pm$  SD. Scale bars, 10  $\mu$ m. **c** HeLa cells were treated with 20  $\mu$ M etoposide for the indicated times, with or without 5  $\mu$ M PJ34 for 1 h prior to etoposide treatment and then analyzed by immunoblotting. **d** Recombinant HIS-H1.2 was incubated with or without NAD<sup>+</sup> and PARP1 as indicated. The samples were analyzed by immunoblotting after *in vitro* PARylation assay. **e** Location of the H1.2 C-terminal deletion mutants. **f** Recombinant full-length (FL), C1-deleted ( $\Delta$ C1), C2-deleted ( $\Delta$ C2) or C-deleted ( $\Delta$ C) GST-H1.2 were assessed for *in vitro* PARylation assay. **g, h** HeLa cells were transfected with the indicated plasmids and treated with 1  $\mu$ M CHX or 20  $\mu$ M etoposide for the indicated times before analyzed by immunoblotting. **i** HeLa cells were stably transfected with shRNAs targeting PARP1 and several clones (1-6#) were selected for immunoblotting to determine the efficiency of PARP1 knockdown. **j** HeLa cells were transfected with the indicated siRNAs and treated with 40  $\mu$ M etoposide for 15 min with or without 5  $\mu$ M PJ34 for 1 h and then analyzed by immunoblotting.
