# Supplementary material for: Destabilization of linker histone H1.2 is essential for ATM activation and DNA damage repair
Source: PubMed Central journal article supplement (PMC6028381; doi:10.1038/s41422-018-0048-0), 2018-05-29
Supplement: 41422_2018_48_MOESM6_ESM.pdf [file 41422_2018_48_MOESM6_ESM.pdf]

Figure S6

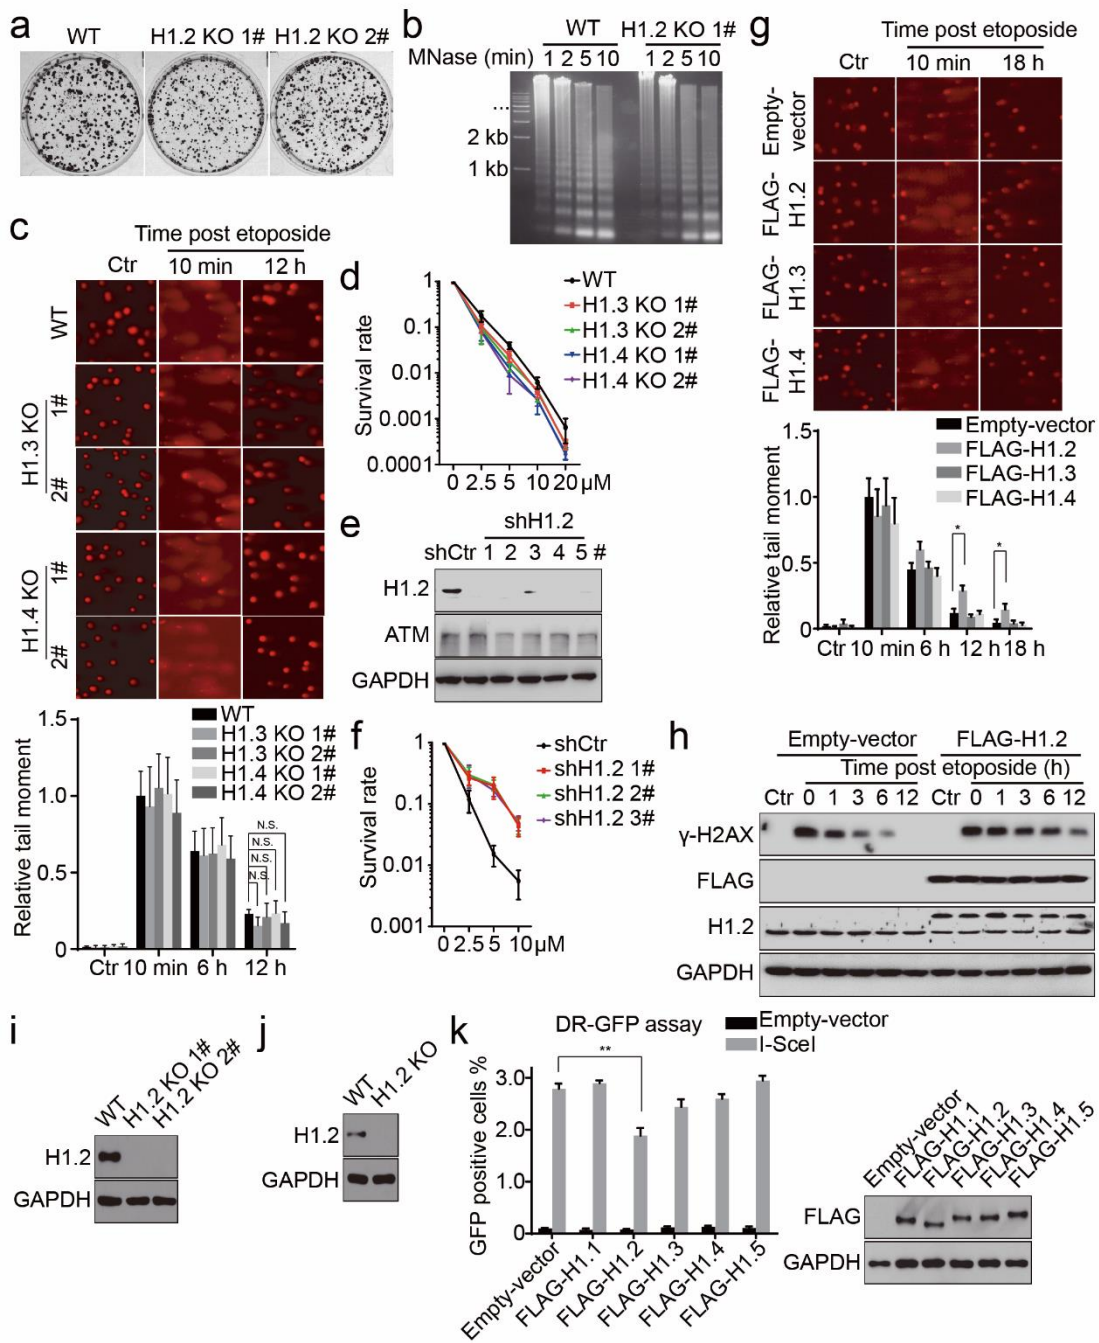

**Figure S6. Linker histone H1.2 inhibits DNA damage repair and cell survival**

**a** WT and H1.2 KO (1# and 2#) HeLa cells were seeded into 6-well plates (500 cells per well) and subjected to colony formation assay. **b** WT and H1.2 KO (1#) HeLa cells were subjected to micrococcal nuclease (MNase) sensitivity assay. **c** WT, H1.3 KO (1# and 2#) and H1.4 KO (1# and 2#) HeLa cells were subjected to comet assay. The cells were collected at the indicated times after treatment with 40  $\mu$ M etoposide for 2 h. The tail moment of WT cells at 10 min post treatment was normalized to 1 and the quantification results are shown. The data represent the mean  $\pm$  SD. **d** WT, H1.3 KO (1# and 2#) and H1.4 KO (1# and 2#) HeLa cells were subjected to colony formation assay after treatment with different doses of etoposide for 2 h. The data represent the mean  $\pm$  SD. **e** HeLa cells were stably transfected with shRNAs targeting H1.2 and several clones (1-5#) were selected for immunoblotting to determine the knockdown efficiency. **f** H1.2 stable-knockdown (1-3#) or non-specific knockdown HeLa cells were treated with the indicated dose of etoposide for 2 h and subjected to colony formation assay. **g** HeLa cells with stably over-expressed FLAG-H1.2, H1.3, H1.4 or an empty vector were subject to comet assay. The tail moment of the empty vector cells at 10 min post treatment was normalized to 1. The data represent the mean  $\pm$  SD. **h** HeLa cells were transfected with FLAG-H1.2 or an empty vector and were separately treated with 40  $\mu$ M etoposide for 1 h and released at the indicated times. **i, j** Immunoblots for H1.2 and GAPDH in WT or H1.2 KO DR-GFP and pEJ5-GFP cells. **k** DR-GFP U2OS cells were transfected with the indicated plasmids and subjected to DR-GFP assay. The data represent the mean  $\pm$  SD.
