# Supplementary material for: Destabilization of linker histone H1.2 is essential for ATM activation and DNA damage repair
Source: PubMed Central journal article supplement (PMC6028381; doi:10.1038/s41422-018-0048-0), 2018-05-29
Supplement: 41422_2018_48_MOESM7_ESM.pdf [file 41422_2018_48_MOESM7_ESM.pdf]

Figure S7

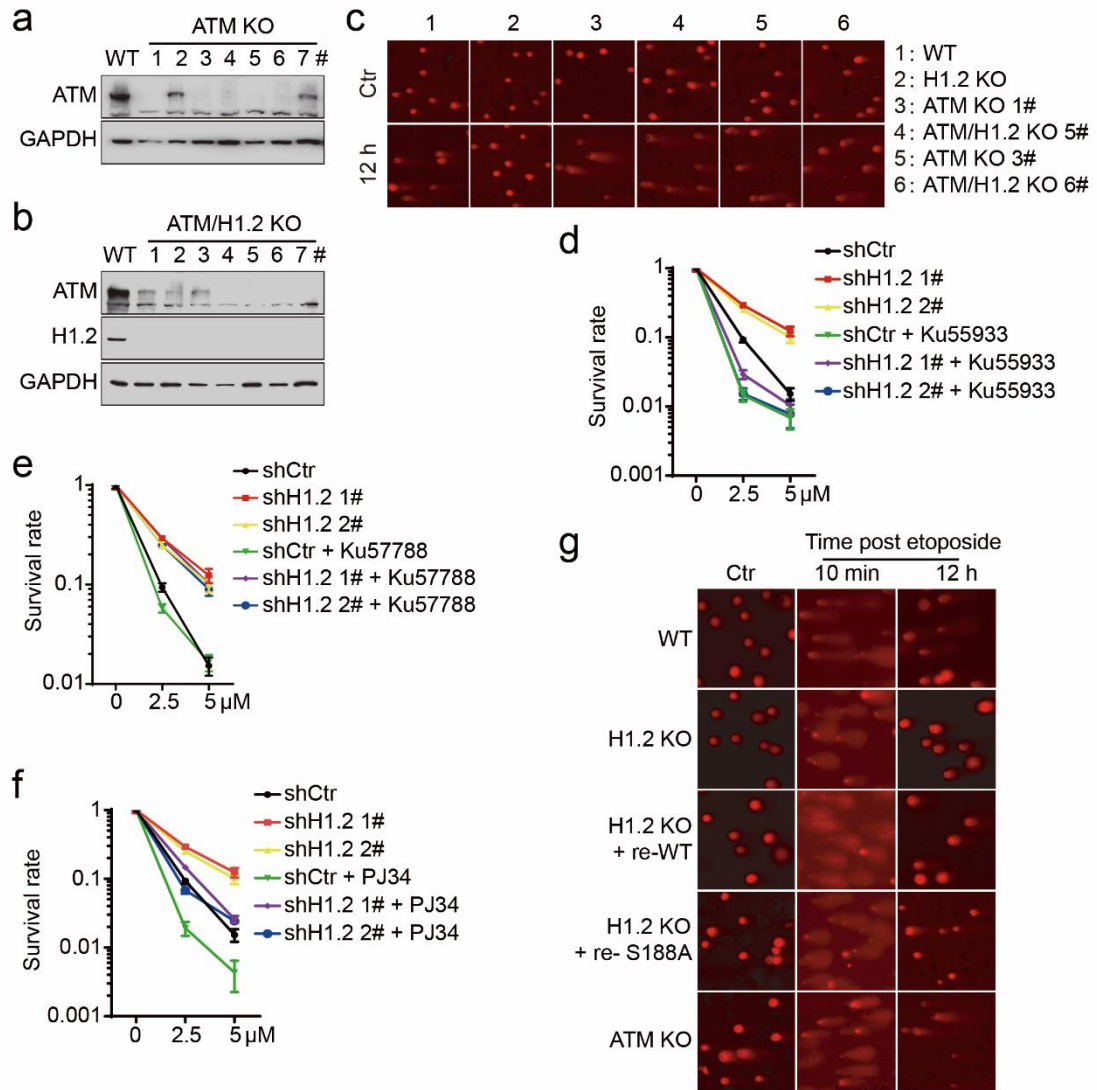

**Figure S7. Linker histone H1.2 dissociation and destabilization is indispensable for DNA repair and cell survival**

**a** Verification of ATM KO (KO) via CRISPR-Cas9 targeting in WT HeLa cells by immunoblotting, and efficiencies of clone 2# and 7# were poor. **b** Verification of ATM KO in H1.2 KO (1#) HeLa cells using CRISPR-Cas9 targeting by immunoblotting, and efficiencies of clone 1-3# were poor. **c** Representative images of the comet assay detailed in Figure 7e. **d-f** H1.2 stable-knockdown (1# and 2#) or control knockdown HeLa cells were treated with different doses of etoposide for 2 h with or without prior treatment with 20  $\mu$ M Ku55933, 2  $\mu$ M Ku57788 or 5  $\mu$ M PJ34 for 1 h and then subjected to colony formation assay. The data represent the mean  $\pm$  SD. **g** Representative images of the comet assay detailed in Figure 7g.
