# Supplementary material for: Destabilization of linker histone H1.2 is essential for ATM activation and DNA damage repair
Source: PubMed Central journal article supplement (PMC6028381; doi:10.1038/s41422-018-0048-0), 2018-05-29
Supplement: 41422_2018_48_MOESM8_ESM.pdf [file 41422_2018_48_MOESM8_ESM.pdf]

## **Supplementary information, Data S1**

### **Materials and Methods**

#### **siRNA and shRNA**

The following siRNAs were used to silence target genes by transfecting with Lipofectamine 2000 or 3000 (Life Technologies-Invitrogen, USA) according to the manufacturer's instructions:

ATM siRNA 1: UGAAGUCCAUUGCUAAUCATT

ATM siRNA 2: GCGCCUGAUUCGAGAUCCTT

DNA-PKcs siRNA 1: GGGCGCUAAUCGUACUGAATT

DNA-PKcs siRNA 2: GAUCGCACCUUACUCUGUUTT

ATR siRNA 1: GCCAAGACAAAUUCUGUGUTT

ATR siRNA 2: CCUCCGUGAUGUUGCUUGATT

PARP1 siRNA 1: GAAAGUGUGUUCAACUAAUUU

PARP1 siRNA 2: AAGAUAGAGCGUGAAGGCGAA

MRE11 siRNA: GGAGGUACGUCGUUUCAGA

H1.2 siRNA: AAGAGCGUAGCGGAGUUUCUC

PARP1 and H1.2 stable knockdown HeLa cells were generated using shRNA constructs with the above siRNA sequences cloned into pGPH1/Neo vector (GenePharma, China). shRNAs were transfected with Lipofectamine 2000 and cells were selected with G418 (10 mg/mL) for about 2 weeks. Colonies were picked for cell growth and knockdown efficiencies were verified by immunoblotting.

#### **IR exposure**

The biological X-ray irradiator RS2000pro Rad Source was purchased from Rad Source Technologies (Rad Source Technologies, USA) and cells were irradiated with radiation output of 160 KV, 25 mA at a dose rate of 4.125 Gy/min for the indicated dosage.

### **Nucleic and cytoplasmic fractionation**

Cells were suspended in buffer A (10 mM HEPES pH 7.9, 10 mM KCl, 0.1 mM EDTA, 0.1 mM EGTA) supplemented with 1 mM dithiothreitol, 0.15% Nonidet P40 and 1% protease inhibitor cocktail and lysed on ice for 10 min. The supernatant fraction was collected as a cytoplasmic extract after centrifugation at 12,000g for 30 s. The pellet was washed, resuspended in buffer B (20 mM HEPES pH 7.9, 400 mM NaCl, 1 mM EDTA, 1 mM EGTA) supplemented with 1 mM dithiothreitol, 0.5% Nonidet P40 and 1% protease inhibitor cocktail and lysed on ice for 15 min with vigorous vortex every 3 min. The supernatant fraction from the centrifugation was used as the nuclear extract.

### ***In vitro* degradation assay**

GST-H1.2 or H1.4 was incubated at 37 °C in HEPES buffer (50 mM HEPES pH 7.5, 1 mM DTT, 0.018% SDS) in the presence of 20S proteasomes (Millipore, USA) for the indicated time with or without MG132. The reaction was stopped by adding 5× SDS/PAGE sample buffer and the samples were analyzed by immunoblotting.

### **Immunoblotting**

Equal amounts of proteins were size fractionated by 6-15% SDS-PAGE, transferred onto

nitrocellulose membranes and blocked (5% nonfat milk, 200 mM NaCl, 25 mM Tris·HCl pH 7.5, and 0.05% Tween 20). The membranes were incubated with indicated primary antibodies at 4°C overnight with gentle shaking. Protein bands were detected using a chemiluminescent detection system (Tanon 5200, China) after incubating with secondary antibodies and washing with TBS-T (20 mM Tris, 500 mM NaCl, and 0.1% Tween 20).

### **Mononucleosome extraction**

Cells were harvested into buffer A (10 mM HEPES pH 7.9, 10 mM KCl, 1.5 mM MgCl<sub>2</sub>, 0.34 M sucrose and 10% glycerol, 1 mM DTT and 0.1% Triton X-100) and lysed on ice for 8 min. Discard the supernatant and dissolve the pellets in buffer B (3 mM EDTA, 0.2 mM EGTA) for 30 min on ice. Discard the supernatant and digest the pellets with MNase at a concentration of 10 U/1 mL in buffer C (10 mM Tris·HCl pH 7.5, 1 mM NaCl, 3 mM MgCl<sub>2</sub>, 1 mM CaCl<sub>2</sub>) at 37 °C for 30 min. The supernatant was collected after centrifugation at 12,000 rpm for 10 min and subjected to *in vitro* experiments or immunoblotting.

### **Mass spectrometry and silver stain**

HeLa cells were extracted, immunoprecipitated with anti-IgG or anti-ATM antibodies and subjected to electrophoresis using a 4-12% SDS-PAGE gel. Silver stain was performed using a silver stain kit (Pierce-Thermo Scientific, USA) following the manufacturer's instructions to detect protein bands. Protein bands were cut and sent to PTM BioLabs (Hangzhou, China) for mass spectrometric analysis.

### **Chromatin immunoprecipitation (ChIP) assay**

Briefly, cells were fixed with 1% formaldehyde and lysed in lysis buffer (50 mM Tris·HCl pH 8.0, 5 mM EDTA, 1% SDS). After sonication, the supernatant was collected by centrifugation and pre-cleared in dilution buffer (20 mM Tris·HCl pH 8.0, 2 mM EDTA, 150 mM NaCl, 1% Triton X-100) with protein G or A sepharose and 1 mg/mL salmon sperm DNA. The pre-cleared samples were then incubated with the indicated antibodies and protein G or A sepharose at 4 °C rotating overnight. The beads were then extensively washed and heated at 65 °C for 6 h to reverse the formaldehyde-induced cross-links. The DNA was purified and the DNA expression was analyzed by real-time PCR using the following primers: 5'-TCTTCTTCAAGGACGACGGCAACT-3' (sense), 5'-TTGTAGTTGTACTCCAGCTTGTGC-3' (antisense). The relative occupancy of the indicated protein was calculated by normalizing the occupancy of IgG to 1.

### **Reverse transcription and real-time PCR**

Total RNA was extracted from cells using TRIzol reagent (Invitrogen), following the manufacturer's instructions. Reverse transcription was performed using a HiScript II 1<sup>st</sup> Strand cDNA Synthesis Kit (Vazyme, China), according to the manufacturer's instructions. The relative expression of target genes was measured on an ABI 7500 (Life Technologies, NY, USA) real-time (RT) PCR system using the SYBR-green dye method. The primers used for RT-PCR were as follows: H1.2: 5'-CCGCCTCTAAAGAGCGTAGC-3' (sense), 5'-AGACCAAGTTTGATACGGCTG-3' (antisense); H1.4: 5'-CTCTGGGGAAGCCAAGCCTA-3' (sense), 5'-TCTTTGGGGTCTTCTTGGCG-3'

(antisense); p21: 5'-AATCCTGGTGATGTCCGACCTGTT-3' (sense), 5'-AGACCAATCTGCGCTTGGAGTGAT-3' (antisense); GAPDH: 5'-CAGCAAGAGCACAAGAGGAA-3' (sense), 5'-CCCCTCTTCAAGGGGTCTAC-3' (antisense).

### **Micrococcal nuclease (MNase) sensitivity assay**

Cells were harvested into lysis buffer (10 mM HEPES pH 7.9, 10 mM KCl, 1.5 mM MgCl<sub>2</sub>, 0.34 M sucrose and 10% glycerol, 1 mM DTT and 0.1% Triton X-100). The nuclei were pelleted and digested with MNase (Takara, Japan) at a concentration of 1 U/1 mL in digestion buffer (10 mM Tris·HCl pH 7.5, 1 mM NaCl, 3 mM MgCl<sub>2</sub>, 1 mM CaCl<sub>2</sub>) for 1, 2, 5 or 10 min. Genomic DNA was purified by phenol/chloroform extraction and separated by electrophoresis in 1.2% agarose gel. DNA bands were stained by ethidium bromide (EB) and visualized by Gel Doc XR<sup>+</sup> system (Bio-Rad, USA).

### **Cell cycle synchronization**

HeLa cells were treated with thymidine at 2 mM for 18 h and released into drug-free medium for 9 h, after which the cells were again treated with thymidine at 2 mM for 15 h. Cells were then collected at different time after drug withdrawal: immediately, as G1 phase population; 3 h, as S phase population and 9 h as G2/M phase population.
